# Supplementary material
Source: PubMed Central journal article supplement (PMC4696512)
Supplement: NIHMS742343-supplement-2.pdf [file NIHMS742343-supplement-2.pdf]

**Table 1. Bleeding score**

| SYMPTOMS<br>(up to the time of<br>diagnosis) | SCORE          |                                                                                                      |                    |                                                 |                                                                                                                   |
|----------------------------------------------|----------------|------------------------------------------------------------------------------------------------------|--------------------|-------------------------------------------------|-------------------------------------------------------------------------------------------------------------------|
|                                              | 0 <sup>s</sup> | 1 <sup>s</sup>                                                                                       | 2                  | 3                                               | 4                                                                                                                 |
| Epistaxis                                    | No/trivial     | - > 5/year<br>or<br>- more than 10<br>minutes                                                        | Consultation only* | Packing or cauterization or<br>antifibrinolytic | Blood transfusion or replacement<br>therapy (use of hemostatic blood<br>components and rFVIIa) or<br>desmopressin |
| Cutaneous                                    | No/trivial     | For bruises 5 or<br>more (> 1cm) in<br>exposed areas                                                 | Consultation only* | Extensive                                       | Spontaneous hematoma requiring<br>blood transfusion                                                               |
| Bleeding from minor<br>wounds                | No/trivial     | - > 5/year<br>or<br>- more than 10<br>minutes                                                        | Consultation only* | Surgical hemostasis                             | Blood transfusion, replacement<br>therapy, or desmopressin                                                        |
| Oral cavity                                  | No/trivial     | Present                                                                                              | Consultation only* | Surgical hemostasis or<br>antifibrinolytic      | Blood transfusion, replacement<br>therapy or desmopressin                                                         |
| GI bleeding                                  | No/trivial     | Present (not<br>associated with<br>ulcer, portal<br>hypertension,<br>hemorrhoids,<br>angiodysplasia) | Consultation only* | Surgical hemostasis,<br>antifibrinolytic        | Blood transfusion, replacement<br>therapy or desmopressin                                                         |

|                        |                             |                                                                                                                                               |                                                                                                             |                                                                                                                                                                                       |                                                                                                                                                                                                                                          |
|------------------------|-----------------------------|-----------------------------------------------------------------------------------------------------------------------------------------------|-------------------------------------------------------------------------------------------------------------|---------------------------------------------------------------------------------------------------------------------------------------------------------------------------------------|------------------------------------------------------------------------------------------------------------------------------------------------------------------------------------------------------------------------------------------|
| Hematuria              | No/trivial                  | Present (macroscopic)                                                                                                                         | Consultation only*                                                                                          | Surgical hemostasis, iron therapy                                                                                                                                                     | Blood transfusion, replacement therapy or desmopressin                                                                                                                                                                                   |
| Tooth extraction       | No/trivial or none done     | Reported in $\leq 25\%$ of all procedures, no intervention**                                                                                  | Reported in $>25\%$ of all procedures, no intervention**                                                    | Resuturing or packing or antifibrinolytic                                                                                                                                             | Blood transfusion, replacement therapy or desmopressin                                                                                                                                                                                   |
| Surgery                | No/trivial or none done     | Reported in $\leq 25\%$ of all procedures, no intervention**                                                                                  | Reported in $>25\%$ of all procedures, no intervention**                                                    | Surgical hemostasis or antifibrinolytic                                                                                                                                               | Blood transfusion, replacement therapy or desmopressin                                                                                                                                                                                   |
| Menorrhagia            | No/trivial                  | Consultation only*<br>or<br>- Changing pads more frequently than every 2 hours<br>or<br>- Clot and flooding<br>or<br>- PBAC score $>100^{\#}$ | - Time off work/school $> 2/\text{year}$<br>or<br>- Requiring antifibrinolytics or hormonal or iron therapy | - Requiring combined treatment with antifibrinolytics and hormonal therapy<br>or<br>- Present since menarche and $> 12$ months                                                        | - Acute menorrhagia requiring hospital admission and emergency treatment<br>or<br>- Requiring blood transfusion, Replacement therapy, Desmopressin,<br>or<br>- Requiring dilatation & curettage or endometrial ablation or hysterectomy) |
| Post-partum hemorrhage | No/trivial or no deliveries | Consultation only*<br>or<br>- Use of syntocin<br>or<br>- Lochia $> 6$ weeks                                                                   | - Iron therapy<br>or<br>- Antifibrinolytics                                                                 | - Requiring blood transfusion, replacement therapy, desmopressin<br>or<br>- Requiring examination under anaesthesia and/or the use of uterine balloon/package to tamponade the uterus | - Any procedure requiring critical care or surgical intervention (e.g. hysterectomy, internal iliac artery ligation, uterine artery embolization, uterine brace sutures)                                                                 |
| Muscle hematomas       | Never                       | Post trauma, no therapy                                                                                                                       | Spontaneous, no therapy                                                                                     | Spontaneous or traumatic, requiring desmopressin or replacement therapy                                                                                                               | Spontaneous or traumatic, requiring surgical intervention or blood transfusion                                                                                                                                                           |

|                              |            |                         |                         |                                                                         |                                                                                |
|------------------------------|------------|-------------------------|-------------------------|-------------------------------------------------------------------------|--------------------------------------------------------------------------------|
| Hemarthrosis                 | Never      | Post trauma, no therapy | Spontaneous, no therapy | Spontaneous or traumatic, requiring desmopressin or replacement therapy | Spontaneous or traumatic, requiring surgical intervention or blood transfusion |
| CNS bleeding                 | Never      | -                       | -                       | Subdural, any intervention                                              | Intracerebral, any intervention                                                |
| Other bleedings <sup>^</sup> | No/trivial | Present                 | Consultation only*      | Surgical hemostasis, antifibrinolytics or iron therapy                  | Blood transfusion or replacement therapy or desmopressin                       |

In addition to the guidance offered by the table, it is mandatory to refer to the text for more detailed instructions.

<sup>§</sup> Distinction between 0 and 1 is of critical importance. Score 1 means that the symptom is judged as present in the patient's history by the interviewer but does not qualify for a score 2 or more

\* Consultation only: the patient sought medical evaluation and was either referred to a specialist or offered detailed laboratory investigation

\*\* Example: 1 extraction/surgery resulting in bleeding (100%): the score to be assigned is 2; 2 extractions/surgeries, 1 resulting in bleeding (50%): the score to be assigned is 2; 3 extractions/surgeries, 1 resulting in bleeding (33%): the score to be assigned is 2; 4 extractions/surgeries, 1 resulting in bleeding (25%): the score to be assigned is 1

<sup>#</sup> If already available at the time of collection

<sup>^</sup> Include: umbilical stump bleeding, cephalohematoma, cheek hematoma caused by sucking during breast/bottle feeding, conjunctival hemorrhage or excessive bleeding following circumcision or venipuncture. Their presence in infancy requires detailed investigation independently from the overall score
